# Supplementary material for: Evaluation of Molecular Methods To Improve the Detection of Burkholderia pseudomallei in Soil and Water Samples from Laos
Source: PubMed Central journal article supplement (PMC4421066; doi:10.1128/aem.04204-14), 2015-05-05
Supplement: AEM.04204-14_zam999116301so1.pdf [file AEM.04204-14_zam999116301so1.pdf]

**Table S1: Overview of the soil sample culture and molecular results by sampling point.**

| <b>Sample ID</b> | <b>Conventional Culture</b> | <b>Simplified method</b> | <b>ES/qPCR</b> | <b>DS/qPCR</b> |
|------------------|-----------------------------|--------------------------|----------------|----------------|
| 1.30             | Positive                    | Positive                 | Positive       | Negative       |
| 1.60             | Positive                    | Negative                 | Positive       | Positive       |
| 2.30             | Positive                    | Positive                 | Positive       | Positive       |
| 2.60             | Positive                    | Negative                 | Positive       | Negative       |
| 3.30             | Positive                    | Negative                 | Positive       | Negative       |
| 3.60             | Positive                    | Positive                 | Positive       | Negative       |
| 4.30             | Negative                    | Negative                 | Positive       | Negative       |
| 4.60             | Negative                    | Negative                 | Positive       | Negative       |
| 5.30             | Negative                    | Negative                 | Positive       | Negative       |
| 5.60             | Positive                    | Negative                 | Positive       | Negative       |
| 6.30             | Positive                    | Negative                 | Positive       | Negative       |
| 6.60             | Positive                    | Negative                 | Positive       | Negative       |
| 7.30             | Positive                    | Negative                 | Positive       | Negative       |
| 7.60             | Positive                    | Negative                 | Positive       | Positive       |
| 8.30             | Positive                    | Positive                 | Positive       | Positive       |
| 8.60             | Positive                    | Positive                 | Positive       | Negative       |
| 9.30             | Positive                    | Positive                 | Positive       | Negative       |
| 9.60             | Negative                    | Negative                 | Positive       | Negative       |
| 10.30            | Positive                    | Negative                 | Positive       | Negative       |
| 10.60            | Negative                    | Positive                 | Positive       | Negative       |
| 11.30            | Negative                    | Negative                 | Positive       | Negative       |
| 11.60            | Negative                    | Negative                 | Positive       | Negative       |
| 12.30            | Negative                    | Negative                 | Positive       | Negative       |
| 12.60            | Negative                    | Negative                 | Negative       | Negative       |
| 13.30            | Positive                    | Negative                 | Positive       | Negative       |
| 13.60            | Positive                    | Negative                 | Positive       | Negative       |
| 14.30            | Negative                    | Negative                 | Positive       | Negative       |
| 14.60            | Negative                    | Negative                 | Positive       | Negative       |
| 15.30            | Negative                    | Negative                 | Positive       | Negative       |
| 15.60            | Negative                    | Negative                 | Positive       | Negative       |
| 16.30            | Negative                    | Negative                 | Positive       | Negative       |
| 16.60            | Negative                    | Negative                 | Negative       | Negative       |
| 17.30            | Negative                    | Negative                 | Positive       | Negative       |
| 17.60            | Negative                    | Negative                 | Positive       | Negative       |
| 18.30            | Positive                    | Negative                 | Positive       | Negative       |
| 18.60            | Negative                    | Negative                 | Negative       | Negative       |
| 19.30            | Negative                    | Negative                 | Positive       | Negative       |
| 19.60            | Positive                    | Positive                 | Positive       | Positive       |
| 20.30            | Negative                    | Negative                 | Positive       | Negative       |
| 20.60            | Negative                    | Negative                 | Positive       | Negative       |
| 21.30            | Negative                    | Negative                 | Negative       | Negative       |

|       |          |          |          |          |
|-------|----------|----------|----------|----------|
| 21.60 | Negative | Negative | Positive | Negative |
| 22.30 | Positive | Negative | Positive | Negative |
| 22.60 | Negative | Negative | Positive | Negative |
| 23.30 | Positive | Negative | Positive | Negative |
| 23.60 | Positive | Positive | Positive | Negative |
| 24.30 | Positive | Negative | Positive | Negative |
| 24.60 | Negative | Negative | Positive | Negative |
| 25.30 | Negative | Negative | Negative | Negative |
| 25.60 | Negative | Negative | Negative | Negative |
| 26.30 | Negative | Negative | Negative | Negative |
| 26.60 | Positive | Negative | Positive | Negative |
| 27.30 | Negative | Negative | Positive | Negative |
| 27.60 | Positive | Negative | Positive | Negative |
| 28.30 | Positive | Negative | Positive | Negative |
| 28.60 | Positive | Negative | Positive | Negative |
| 29.30 | Positive | Negative | Positive | Negative |
| 29.60 | Positive | Negative | Positive | Negative |
| 30.30 | Positive | Negative | Positive | Negative |
| 30.60 | Positive | Positive | Positive | Negative |
| 31.30 | Negative | Negative | Negative | Negative |
| 31.60 | Positive | Negative | Positive | Negative |
| 32.30 | Negative | Negative | Positive | Negative |
| 32.60 | Positive | Negative | Positive | Negative |
| 33.30 | Negative | Negative | Positive | Negative |
| 33.60 | Positive | Negative | Positive | Negative |
| 34.30 | Positive | Negative | Positive | Negative |
| 34.60 | Positive | Negative | Negative | Negative |
| 35.30 | Negative | Negative | Negative | Negative |
| 35.60 | Negative | Negative | Positive | Negative |
| 36.30 | Negative | Negative | Positive | Negative |
| 36.60 | Negative | Negative | Positive | Negative |
| 37.30 | Negative | Negative | Positive | Negative |
| 37.60 | Negative | Negative | Negative | Negative |
| 38.30 | Negative | Negative | Positive | Negative |
| 38.60 | Negative | Negative | Positive | Negative |
| 39.30 | Negative | Negative | Positive | Negative |
| 39.60 | Negative | Negative | Positive | Negative |
| 40.30 | Negative | Negative | Negative | Negative |
| 40.60 | Positive | Negative | Positive | Negative |
| 41.30 | Negative | Negative | Positive | Negative |
| 41.60 | Negative | Negative | Negative | Negative |
| 42.30 | Negative | Negative | Positive | Negative |
| 42.60 | Positive | Negative | Positive | Negative |
| 43.30 | Negative | Negative | Positive | Negative |
| 43.60 | Negative | Negative | Positive | Negative |

|       |          |          |          |          |
|-------|----------|----------|----------|----------|
| 44.30 | Negative | Negative | Positive | Negative |
| 44.60 | Positive | Negative | Positive | Negative |
| 45.30 | Positive | Negative | Positive | Positive |
| 45.60 | Positive | Negative | Positive | Negative |
| 46.30 | Negative | Negative | Positive | Negative |
| 46.60 | Positive | Negative | Positive | Negative |
| 47.30 | Positive | Negative | Positive | Negative |
| 47.60 | Negative | Negative | Positive | Negative |
| 48.30 | Negative | Negative | Positive | Negative |
| 48.60 | Negative | Negative | Positive | Negative |
| 49.30 | Negative | Negative | Positive | Negative |
| 49.60 | Negative | Negative | Negative | Negative |
| 50.30 | Negative | Negative | Negative | Negative |
| 50.60 | Negative | Negative | Negative | Negative |

**Table S2: Overview of water characteristics and culture and molecular results by sampling point.**

Temperature was measured in 'degrees Celsius' (°C), the pH was measured as 'log protons activity' and the water turbidity was measured in nephelometric turbidity units (NTU).

| Sampling station | Temperature (°C) | pH   | Turbidity (NTU) | Direct culture | Enrichment culture | Culture all | EF/qPCR | DF/qPCR |
|------------------|------------------|------|-----------------|----------------|--------------------|-------------|---------|---------|
| SR_1             | 25.27            | 6.32 | 727             | 1              | 0                  | 1           | 1       | 0       |
| ST_1             | 28.24            | 6.75 | 319             | 1              | 0                  | 1           | 1       | 1       |
| SR_2             | 25.67            | 6.64 | 542             | 1              | 0                  | 1           | 1       | 1       |
| SR_3             | 25.92            | 6.42 | 446             | 1              | 0                  | 1           | 1       | 1       |
| ST_12            | 26.36            | 6.53 | 422             | 1              | 1                  | 1           | 1       | 1       |
| ST_11            | 23.88            | 7.32 | 25.9            | 1              | 1                  | 1           | 1       | 0       |
| ST_10            | 24.3             | 7.11 | 18.2            | 0              | 0                  | 0           | 0       | 0       |
| SR_6             | 26.86            | 7.28 | 177             | 0              | 0                  | 0           | 0       | 0       |
| ST_13            | 27.17            | 7.57 | 118             | 1              | 0                  | 1           | 0       | 0       |
| ST_4             | 26.88            | 7.41 | 55.9            | 0              | 0                  | 0           | 0       | 0       |
| SR_5             | 26.67            | 7.41 | 271             | 1              | 1                  | 1           | 1       | 1       |
| ST_3             | 28.16            | 7.07 | 404             | 0              | 0                  | 0           | 0       | 0       |
| SR_4             | 26.86            | 7.22 | 362             | 0              | 0                  | 1           | 1       | 0       |
| ST_2             | 28.18            | 5.27 | 585             | 1              | 1                  | 1           | 1       | 1       |
| SR_7             | 26.63            | 7.1  | 313             | 1              | 1                  | 1           | 1       | 1       |
| ST_6             | 26.24            | 7.74 | 237             | 1              | 1                  | 1           | 1       | 1       |
| ST_7             | 23.89            | 7.63 | 54.4            | 1              | 1                  | 1           | 1       | 1       |
| ST_8             | 25.33            | 7.82 | 45.9            | 1              | 1                  | 1           | 1       | 1       |
| ST_9             | 24.44            | 7.39 | 73.7            | 0              | 1                  | 1           | 1       | 1       |
| ST_14            | 27.16            | 7.49 | 417             | 1              | 1                  | 1           | 1       | 0       |
